# Supplementary material for: Immune Evasion of SARS-CoV-2 Omicron Subvariants XBB.1.5, XBB.1.16 and EG.5.1 in a Cohort of Older Adults after ChAdOx1-S Vaccination and BA.4/5 Bivalent Booster
Source: MDPI journal article supplement (doi:10.3390/vaccines12020144), 2024-01-30
Supplement: s1 [file s1]

**Supplemental Table S1. Summary of patient's information (n=59).** Identification (ID), race, day of birth (DOB), age (years), sex (F, female or M, male), comorbidities, previously SARS-CoV-2 reported infection (RT-qPCR positivity, date and Ct value), epidemiological Omicron wave based on date of infection (see materials and methods for details) and days post infection (DPI) and 1<sup>st</sup> blood collection on November 10, 2022. Ct, cycle threshold. N/A, not applicable.

| Participant ID | Race  | DOB        | Age (years) | Sex (F/M) | Comorbidities                                    | RT-qPCR positive for SARS-CoV-2 | Ct value | Date of RT-qPCR positivity for SARS-CoV-2 | Epidemiological Omicron wave | Days post infection and 1st blood collection (11/10/22) |
|----------------|-------|------------|-------------|-----------|--------------------------------------------------|---------------------------------|----------|-------------------------------------------|------------------------------|---------------------------------------------------------|
| 318775         | Mixed | 17/09/1947 | 75          | M         | Dysmobility syndrome                             | Positive                        | 19       | 1/24/22                                   | BA.1/BA.2                    | 290                                                     |
| 421648         | White | 03/06/1937 | 85          | F         | Alzheimer's disease                              | Positive                        | 36       | 7/8/22                                    | BA.4/BA.5                    | 125                                                     |
| 323845         | White | 21/07/1952 | 70          | F         | Dementia                                         | Positive                        | 32       | 1/21/22                                   | BA.1/BA.2                    | 293                                                     |
| 379131         | White | 11/11/1953 | 69          | F         | Dementia                                         | Positive                        | 22       | 7/8/22                                    | BA.4/BA.5                    | 125                                                     |
| 267871         | White | 12/07/1947 | 75          | F         | Dysmobility syndrome                             | Positive                        | 24       | 1/18/22                                   | BA.1/BA.2                    | 296                                                     |
| 267367         | Black | 12/10/1958 | 64          | M         | Rheumatic fever                                  | Positive                        | 23       | 6/13/22                                   | BA.4/BA.5                    | 150                                                     |
| 230397         | White | 02/09/1959 | 63          | F         | Schizophrenia                                    | Negative                        | N/A      | N/A                                       | N/A                          | N/A                                                     |
| 494837         | Asian | 08/06/1938 | 84          | F         | Hypertension                                     | Negative                        | N/A      | N/A                                       | N/A                          | N/A                                                     |
| 394951         | Mixed | 21/08/1944 | 78          | F         | Dementia                                         | Positive                        | 17       | 6/21/22                                   | BA.4/BA.5                    | 142                                                     |
| 346858         | White | 14/07/1950 | 72          | M         | Dysmobility syndrome                             | Negative                        | N/A      | N/A                                       | N/A                          | N/A                                                     |
| 406477         | Mixed | 11/12/1948 | 74          | M         | Dementia                                         | Positive                        | 22       | 1/24/22                                   | BA.1/BA.2                    | 290                                                     |
| 267519         | Black | 31/12/1953 | 68          | M         | Hypertension                                     | Positive                        | 20       | 1/26/22                                   | BA.1/BA.2                    | 288                                                     |
| 407102         | Mixed | 19/06/1960 | 62          | M         | None                                             | Negative                        | N/A      | N/A                                       | N/A                          | N/A                                                     |
| 298184         | White | 17/06/1956 | 66          | M         | Hypertension                                     | Positive                        | 25       | 6/20/22                                   | BA.4/BA.5                    | 143                                                     |
| 378877         | White | 13/06/1925 | 97          | M         | Dysmobility syndrome                             | Positive                        | 22       | 6/20/22                                   | BA.4/BA.5                    | 143                                                     |
| 304913         | Mixed | 19/10/1956 | 66          | M         | Dysmobility syndrome                             | Negative                        | N/A      | N/A                                       | N/A                          | N/A                                                     |
| 267864         | Black | 15/03/1951 | 71          | M         | Hypertension                                     | Positive                        | 23       | 6/13/22                                   | BA.4/BA.5                    | 150                                                     |
| 267549         | Mixed | 19/10/1956 | 66          | M         | Sequeale of stroke                               | Negative                        | N/A      | N/A                                       | N/A                          | N/A                                                     |
| 476825         | Mixed | 17/03/1957 | 65          | M         | Dysmobility syndrome                             | Negative                        | N/A      | N/A                                       | N/A                          | N/A                                                     |
| 476761         | White | 11/07/1941 | 81          | F         | Hypertension                                     | Positive                        | 37       | 7/1/22                                    | BA.4/BA.5                    | 132                                                     |
| 476919         | Asian | 16/05/1949 | 73          | M         | None                                             | Negative                        | N/A      | N/A                                       | N/A                          | N/A                                                     |
| 267420         | Black | 05/02/1934 | 88          | F         | Sequale of Traumatic Brain Injury (TBI)          | Positive                        | 23       | 6/30/22                                   | BA.4/BA.5                    | 133                                                     |
| 355937         | White | 08/03/1938 | 84          | F         | None                                             | Negative                        | N/A      | N/A                                       | N/A                          | N/A                                                     |
| 359150         | White | 30/09/1946 | 76          | F         | Hypertension                                     | Positive                        | 30       | 1/18/22                                   | BA.1/BA.2                    | 296                                                     |
| 112553         | White | 21/03/1950 | 72          | F         | Dysmobility syndrome                             | Positive                        | 22       | 6/20/22                                   | BA.4/BA.5                    | 143                                                     |
| 111333         | White | 19/08/1947 | 75          | F         | Dysmobility syndrome and cerebral palsy          | Positive                        | 29       | 1/18/22                                   | BA.1/BA.2                    | 296                                                     |
| 271671         | Black | 04/08/1957 | 65          | F         | Sequale of stroke                                | Negative                        | N/A      | N/A                                       | N/A                          | N/A                                                     |
| 198987         | Mixed | 02/11/1932 | 90          | F         | Dementia                                         | Negative                        | N/A      | N/A                                       | N/A                          | N/A                                                     |
| 323515         | Black | 07/03/1936 | 86          | F         | Schizophrenia                                    | Positive                        | 22       | 7/12/22                                   | BA.4/BA.5                    | 121                                                     |
| 320888         | White | 19/02/1948 | 74          | F         | Dementia                                         | Positive                        | 18       | 4/25/22                                   | BA.1/BA.2                    | 199                                                     |
| 267765         | Black | 21/01/1937 | 85          | F         | Dementia                                         | Positive                        | 22       | 1/18/22                                   | BA.1/BA.2                    | 296                                                     |
| 110443         | White | 17/11/1942 | 80          | F         | Schizophrenia                                    | Positive                        | 28       | 1/14/22                                   | BA.1/BA.2                    | 300                                                     |
| 401522         | Mixed | 29/09/1949 | 73          | F         | Dementia                                         | Positive                        | 21       | 6/21/22                                   | BA.4/BA.5                    | 142                                                     |
| 380501         | White | 23/12/1940 | 81          | F         | Type 2 diabetes mellitus (T2DM)                  | Positive                        | 19       | 1/28/22                                   | BA.1/BA.2                    | 286                                                     |
| 176972         | Black | 04/07/1941 | 81          | F         | Sequale of stroke                                | Negative                        | N/A      | N/A                                       | N/A                          | N/A                                                     |
| 336759         | White | 14/07/1939 | 83          | F         | Schizophrenia                                    | Negative                        | N/A      | N/A                                       | N/A                          | N/A                                                     |
| 482490         | Mixed | 13/12/1953 | 69          | M         | Dementia                                         | Negative                        | N/A      | N/A                                       | N/A                          | N/A                                                     |
| 477571         | Mixed | 28/11/1960 | 62          | M         | Type 2 diabetes mellitus (T2DM) and hypertension | Positive                        | 22       | 1/26/22                                   | BA.1/BA.2                    | 288                                                     |
| 192130         | Black | 20/10/1955 | 67          | F         | Hypertension                                     | Positive                        | 18       | 8/7/22                                    | BA.4/BA.5                    | 125                                                     |
| 985            | Black | 19/11/1957 | 65          | F         | Dysmobility syndrome                             | Positive                        | 24       | 2/2/22                                    | BA.1/BA.2                    | 281                                                     |
| 440135         | White | 18/10/1957 | 65          | M         | Dementia                                         | Negative                        | N/A      | N/A                                       | N/A                          | N/A                                                     |
| 442378         | White | 13/01/1958 | 64          | M         | Leprosy                                          | Positive                        | 31       | 6/21/22                                   | BA.4/BA.5                    | 142                                                     |
| 440447         | Mixed | 01/03/1957 | 65          | M         | Dementia                                         | Positive                        | 32       | 6/22/22                                   | BA.4/BA.5                    | 141                                                     |
| 450144         | White | 19/05/1943 | 79          | F         | Dementia                                         | Negative                        | N/A      | N/A                                       | N/A                          | N/A                                                     |
| 447167         | Mixed | 21/11/1939 | 83          | M         | Sequale of stroke                                | Positive                        | 29       | 6/22/22                                   | BA.4/BA.5                    | 141                                                     |
| 267652         | Black | 29/06/1957 | 65          | M         | Sequale of stroke                                | Positive                        | 23       | 6/21/22                                   | BA.4/BA.5                    | 142                                                     |
| 471697         | White | 25/01/1950 | 72          | M         | Dysmobility syndrome                             | Negative                        | N/A      | N/A                                       | N/A                          | N/A                                                     |
| 199379         | Black | 28/08/1945 | 77          | M         | Sequale of stroke                                | Positive                        | 22       | 1/24/22                                   | BA.1/BA.2                    | 290                                                     |
| 370201         | Black | 28/10/1941 | 81          | M         | Dysmobility syndrome                             | Positive                        | 25       | 1/24/22                                   | BA.1/BA.2                    | 290                                                     |
| 267502         | Black | 28/06/1952 | 70          | M         | Sequale of Traumatic Brain Injury (TBI)          | Positive                        | 19       | 1/24/22                                   | BA.1/BA.2                    | 290                                                     |
| 333440         | White | 08/05/1944 | 78          | M         | Dysmobility syndrome                             | Positive                        | 16       | 1/24/22                                   | BA.1/BA.2                    | 290                                                     |
| 267520         | Mixed | 03/06/1954 | 68          | M         | Sequale of stroke                                | Negative                        | N/A      | N/A                                       | N/A                          | N/A                                                     |
| 28511          | Black | 10/01/1942 | 80          | M         | Dysmobility syndrome                             | Negative                        | N/A      | N/A                                       | N/A                          | N/A                                                     |
| 402327         | Mixed | 08/03/1944 | 78          | M         | Dementia                                         | Positive                        | 22       | 3/23/21                                   | BA.1/BA.2                    | 597                                                     |
| 363357         | White | 20/04/1949 | 73          | M         | Sequale of stroke                                | Positive                        | 20       | 1/28/22                                   | BA.1/BA.2                    | 286                                                     |
| 290602         | Mixed | 11/02/1954 | 68          | M         | Dysmobility syndrome                             | Negative                        | N/A      | N/A                                       | N/A                          | N/A                                                     |
| 160442         | Mixed | 12/08/1952 | 70          | M         | Hypertension                                     | Positive                        | 22       | 1/24/22                                   | BA.1/BA.2                    | 290                                                     |
| 211607         | White | 08/10/1938 | 84          | M         | None                                             | Negative                        | N/A      | N/A                                       | N/A                          | N/A                                                     |
| 466183         | White | 31/05/1943 | 79          | M         | Dementia                                         | Negative                        | N/A      | N/A                                       | N/A                          | N/A                                                     |

**Supplemental Table S2. Vaccination records from all the participants of the study (n=49).** Identification (ID), the full vaccination record against COVID-19, including which vaccine, the date of administration and the vaccine batch number.

[illegible]

**Supplemental Table S3. Geometric mean titers (GMTs), 95% CI and of neutralizing titers and percentage (%) of seroconversion against SARS-CoV-2 ancestral strain (D614G) and Omicron sublineages BA.4/5, XBB.1.5, XBB.1.16 and EG.5.1 at 1-4 months post 4<sup>th</sup> dose with ChAdOx1-S (Oxford/AstraZeneca) and 3 months post 5<sup>th</sup> dose with Comirnaty Bivalent Original/Omicron BA.4/BA.5 (Pfizer-BioNTech).** Individual NT<sub>50</sub> values is the geometric mean (GMT) of triplicate CPE-VNT results (one independent experiment). Titers below the LOD (<20) were represented by half the LOD, 10 for plot purpose and statistical analysis. ID, identification; dpv, days post-vaccination; NT<sub>50</sub>, 50% neutralization antibody titer; 95% CI, 95% confidence interval.

| Participant ID      | Neutralization titer (NT50)                                                 |              |             |             |             |                                                                               |              |             |             |             |                                                                                                 |              |              |              |              |
|---------------------|-----------------------------------------------------------------------------|--------------|-------------|-------------|-------------|-------------------------------------------------------------------------------|--------------|-------------|-------------|-------------|-------------------------------------------------------------------------------------------------|--------------|--------------|--------------|--------------|
|                     | 1 month (median 36 days) after 4th dose with ChAdOx1-S (Oxford/AstraZeneca) |              |             |             |             | 4 months (median 126 days) after 4th dose with ChAdOx1-S (Oxford/AstraZeneca) |              |             |             |             | 3 months (median 91 days) after Comirnaty Bivalent Original/Omicron BA.4/BA.5 (Pfizer-BioNTech) |              |              |              |              |
|                     | D614G                                                                       | BA.4         | XBB.1.5     | XBB.1.16    | EG.5.1      | D614G                                                                         | BA.4         | XBB.1.5     | XBB.1.16    | EG.5.1      | D614G                                                                                           | BA.4         | XBB.1.5      | XBB.1.16     | EG.5.1       |
| 440135              | 3620                                                                        | 1810         | 453         | 226         | 113         | 1810                                                                          | 905          | 226         | 22          | 71          | 2874                                                                                            | 3620         | 570          | 453          | 570          |
| 442378              | 3620                                                                        | 905          | 22          | 18          | 45          | 2874                                                                          | 905          | 71          | 14          | 57          | 3620                                                                                            | 3620         | 180          | 180          | 113          |
| 440447              | 3620                                                                        | 3620         | 28          | 14          | 22          | 3620                                                                          | 1437         | 71          | 14          | 28          | 3620                                                                                            | 2874         | 71           | 143          | 143          |
| 450144              | 1140                                                                        | 226          | 28          | 18          | 36          | 1140                                                                          | 285          | 22          | 14          | 14          | 3620                                                                                            | 3620         | 718          | 359          | 180          |
| 447167              | 3620                                                                        | 905          | 226         | 143         | 113         | 226                                                                           | 90           | 14          | 14          | 14          | 2874                                                                                            | 905          | 143          | 143          | 143          |
| 267652              | 226                                                                         | 453          | 180         | 71          | 143         | 453                                                                           | 2281         | 453         | 143         | 143         | 1437                                                                                            | 2874         | 905          | 453          | 570          |
| 471697              | 718                                                                         | 453          | 36          | 28          | 36          | 2281                                                                          | 1810         | 113         | 45          | 36          | 2874                                                                                            | 3620         | 570          | 285          | 143          |
| 199379              | 1810                                                                        | 2874         | 905         | 285         | 453         | 570                                                                           | 226          | 22          | 14          | 22          | 1140                                                                                            | 1810         | 453          | 143          | 359          |
| 370201              | 3620                                                                        | 3620         | 2281        | 905         | 905         | 2874                                                                          | 453          | 90          | 36          | 45          | 3620                                                                                            | 3620         | 1810         | 359          | 905          |
| 267502              | 2281                                                                        | 453          | 113         | 45          | 71          | 1437                                                                          | 905          | 180         | 57          | 90          | 2874                                                                                            | 3620         | 2281         | 2281         | 905          |
| 333440              | 905                                                                         | 570          | 359         | 143         | 90          | 3620                                                                          | 71           | 45          | 14          | 36          | 2874                                                                                            | 1437         | 180          | 113          | 71           |
| 267520              | 570                                                                         | 285          | 113         | 28          | 180         | 2281                                                                          | 905          | 90          | 22          | 36          | 2874                                                                                            | 1140         | 180          | 143          | 143          |
| 28511               | 3620                                                                        | 2874         | 905         | 453         | 57          | 2281                                                                          | 718          | 180         | 57          | 57          | 2874                                                                                            | 718          | 180          | 71           | 90           |
| 402327              | 3620                                                                        | 1140         | 226         | 113         | 113         | 2281                                                                          | 905          | 226         | 90          | 57          | 3620                                                                                            | 3620         | 453          | 718          | 453          |
| 363357              | 2874                                                                        | 1437         | 570         | 359         | 180         | 2874                                                                          | 359          | 90          | 45          | 57          | 2874                                                                                            | 1810         | 285          | 226          | 285          |
| 290602              | 2874                                                                        | 2281         | 226         | 71          | 180         | 1437                                                                          | 113          | 22          | 28          | 28          | 3620                                                                                            | 1437         | 453          | 226          | 453          |
| 160442              | 113                                                                         | 90           | 18          | 18          | 45          | 2281                                                                          | 2281         | 57          | 18          | 22          | 3620                                                                                            | 2874         | 180          | 143          | 226          |
| 211607              | 2874                                                                        | 1140         | 143         | 57          | 36          | 45                                                                            | 90           | 18          | 14          | 14          | 2874                                                                                            | 3620         | 285          | 285          | 285          |
| 466183              | 2281                                                                        | 3620         | 905         | 285         | 90          | 2874                                                                          | 3620         | 285         | 113         | 113         | 1810                                                                                            | 1810         | 90           | 143          | 113          |
| 406477              | 718                                                                         | 1437         | 143         | 57          | 90          | 359                                                                           | 90           | 14          | 14          | 14          | 453                                                                                             | 2281         | 285          | 226          | 143          |
| 267519              | 1810                                                                        | 1810         | 71          | 57          | 90          | 2281                                                                          | 1437         | 359         | 71          | 90          | 1810                                                                                            | 1140         | 226          | 226          | 180          |
| 407102              | 3620                                                                        | 3620         | 285         | 57          | 180         | 718                                                                           | 36           | 14          | 14          | 14          | 3620                                                                                            | 3620         | 180          | 180          | 71           |
| 298184              | 905                                                                         | 718          | 45          | 14          | 36          | 1437                                                                          | 718          | 71          | 36          | 45          | 2874                                                                                            | 718          | 71           | 90           | 90           |
| 378877              | 1140                                                                        | 570          | 113         | 36          | 90          | 570                                                                           | 226          | 71          | 18          | 57          | 1437                                                                                            | 570          | 113          | 71           | 143          |
| 304913              | 1810                                                                        | 453          | 45          | 18          | 14          | 359                                                                           | 71           | 14          | 14          | 14          | 2281                                                                                            | 905          | 45           | 45           | 36           |
| 267864              | 905                                                                         | 285          | 71          | 28          | 90          | 905                                                                           | 718          | 90          | 36          | 57          | 359                                                                                             | 570          | 180          | 113          | 285          |
| 267549              | 2281                                                                        | 285          | 45          | 22          | 57          | 2874                                                                          | 359          | 180         | 71          | 143         | 1810                                                                                            | 226          | 180          | 57           | 143          |
| 476825              | 3620                                                                        | 1140         | 180         | 113         | 285         | 2281                                                                          | 1140         | 226         | 36          | 71          | 3620                                                                                            | 3620         | 905          | 1140         | 453          |
| 476761              | 2281                                                                        | 3620         | 2281        | 1810        | 905         | 1140                                                                          | 226          | 71          | 36          | 71          | 905                                                                                             | 3620         | 2281         | 1140         | 905          |
| 476919              | 113                                                                         | 14           | 14          | 14          | 14          | 285                                                                           | 71           | 14          | 14          | 14          | 1437                                                                                            | 285          | 28           | 45           | 28           |
| 267420              | 1810                                                                        | 2874         | 359         | 180         | 285         | 2281                                                                          | 2281         | 143         | 57          | 180         | 2874                                                                                            | 3620         | 905          | 359          | 285          |
| 355937              | 1810                                                                        | 570          | 36          | 14          | 14          | 1140                                                                          | 905          | 28          | 14          | 45          | 1437                                                                                            | 359          | 71           | 28           | 71           |
| 359150              | 3620                                                                        | 1810         | 453         | 113         | 180         | 3620                                                                          | 905          | 71          | 28          | 28          | 1810                                                                                            | 718          | 285          | 143          | 57           |
| 112553              | 3620                                                                        | 1140         | 180         | 143         | 285         | 3620                                                                          | 1810         | 45          | 36          | 28          | 2874                                                                                            | 2874         | 285          | 180          | 226          |
| 111333              | 3620                                                                        | 3620         | 570         | 180         | 359         | 2874                                                                          | 1140         | 285         | 71          | 90          | 3620                                                                                            | 3620         | 1437         | 453          | 718          |
| 271671              | 2874                                                                        | 1810         | 570         | 359         | 285         | 718                                                                           | 71           | 45          | 22          | 22          | 3620                                                                                            | 1437         | 905          | 359          | 570          |
| 198987              | 2281                                                                        | 1437         | 143         | 36          | 113         | 2281                                                                          | 285          | 36          | 18          | 57          | 2281                                                                                            | 1810         | 570          | 226          | 180          |
| 323515              | 3620                                                                        | 2281         | 453         | 143         | 180         | 3620                                                                          | 3620         | 28          | 14          | 14          | 3620                                                                                            | 2874         | 718          | 143          | 180          |
| 320888              | 2874                                                                        | 718          | 71          | 28          | 45          | 2874                                                                          | 570          | 180         | 57          | 45          | 1810                                                                                            | 718          | 359          | 180          | 90           |
| 267765              | 2281                                                                        | 1810         | 570         | 285         | 285         | 905                                                                           | 90           | 18          | 14          | 14          | 2281                                                                                            | 453          | 453          | 226          | 285          |
| 110443              | 3620                                                                        | 1437         | 226         | 113         | 180         | 2281                                                                          | 570          | 71          | 36          | 57          | 3620                                                                                            | 3620         | 905          | 359          | 453          |
| 401522              | 2281                                                                        | 453          | 14          | 14          | 18          | 3620                                                                          | 453          | 45          | 14          | 45          | 2874                                                                                            | 453          | 453          | 285          | 453          |
| 380501              | 1437                                                                        | 570          | 45          | 18          | 57          | 2874                                                                          | 718          | 90          | 113         | 71          | 1437                                                                                            | 453          | 180          | 45           | 71           |
| 176972              | 3620                                                                        | 1810         | 453         | 180         | 285         | 570                                                                           | 180          | 14          | 14          | 14          | 3620                                                                                            | 3620         | 285          | 143          | 180          |
| 336759              | 359                                                                         | 359          | 71          | 18          | 57          | 570                                                                           | 359          | 226         | 57          | 45          | 718                                                                                             | 453          | 180          | 57           | 180          |
| 482490              | 905                                                                         | 45           | 18          | 14          | 14          | 453                                                                           | 45           | 14          | 14          | 14          | 3620                                                                                            | 3620         | 2281         | 2281         | 718          |
| 477571              | 2874                                                                        | 905          | 180         | 71          | 180         | 1140                                                                          | 453          | 71          | 22          | 22          | 1810                                                                                            | 2874         | 359          | 718          | 285          |
| 192130              | 905                                                                         | 1140         | 143         | 45          | 143         | 718                                                                           | 905          | 285         | 57          | 226         | 718                                                                                             | 718          | 453          | 180          | 180          |
| 985                 | 453                                                                         | 453          | 71          | 22          | 90          | 718                                                                           | 1140         | 113         | 45          | 143         | 1810                                                                                            | 2281         | 905          | 180          | 453          |
| 394951              | 570                                                                         | 1140         | 90          | 22          | 90          | 718                                                                           | 718          | 453         | 71          | 113         | 570                                                                                             | 905          | 113          | 143          | 143          |
| 346858              | 1810                                                                        | 1140         | 90          | 36          | 113         | 359                                                                           | 718          | 453         | 90          | 36          | 905                                                                                             | 905          | 180          | 226          | 113          |
| 318775              | 905                                                                         | 1810         | 570         | 226         | 180         | 45                                                                            | 18           | 14          | 14          | 14          | 285                                                                                             | 570          | 285          | 226          | 143          |
| 421648              | 2281                                                                        | 2281         | 113         | 28          | 22          | 3620                                                                          | 3620         | 359         | 143         | 90          | 1810                                                                                            | 905          | 143          | 113          | 143          |
| 323845              | 718                                                                         | 285          | 90          | 22          | 22          | 1437                                                                          | 905          | 359         | 143         | 285         | 1437                                                                                            | 2281         | 1810         | 905          | 905          |
| 379131              | 905                                                                         | 570          | 45          | 22          | 28          | 1810                                                                          | 905          | 143         | 57          | 45          | 3620                                                                                            | 905          | 285          | 90           | 71           |
| 267871              | 905                                                                         | 180          | 14          | 14          | 18          | 718                                                                           | 90           | 113         | 36          | 45          | 570                                                                                             | 113          | 113          | 36           | 71           |
| 267367              | 453                                                                         | 570          | 14          | 14          | 14          | 718                                                                           | 359          | 57          | 36          | 36          | 905                                                                                             | 1437         | 453          | 180          | 453          |
| 230397              | 1810                                                                        | 126          | 22          | 14          | 28          | 2281                                                                          | 113          | 36          | 22          | 22          | 718                                                                                             | 2281         | 1140         | 570          | 570          |
| 494837              | 113                                                                         | 71           | 14          | 14          | 14          | 359                                                                           | 180          | 22          | 18          | 18          | 3620                                                                                            | 2281         | 226          | 226          | 226          |
| GMT                 | 1488                                                                        | 803          | 122         | 56          | 81          | 1191                                                                          | 430          | 72          | 32          | 41          | 1958                                                                                            | 1454         | 328          | 203          | 208          |
| 95% CI of GMT       | 1168-1896                                                                   | 592-1088     | 86-173      | 41-77       | 61-108      | 917-1545                                                                      | 310-598      | 54-96       | 26-38       | 34-51       | 1645-2330                                                                                       | 1159-1824    | 253-426      | 159-259      | 167-259      |
| % seroconverted (n) | 100% (59/59)                                                                | 100% (59/59) | 92% (54/59) | 83% (49/59) | 92% (54/59) | 100% (59/59)                                                                  | 100% (59/59) | 86% (51/59) | 70% (41/59) | 80% (47/59) | 100% (59/59)                                                                                    | 100% (59/59) | 100% (59/59) | 100% (59/59) | 100% (59/59) |

**Supplemental Table S4. p values calculated from Wilcoxon matched-pairs signed-rank test for group comparison of NT<sub>50</sub> geometric mean titers (GMTs) at each time-point from Figure 2B-E. Values >0.05 (not statistically significant) are highlighted in red.**

| Figure | Time-point                    | 1 month (median 36 days) after 4th dose with ChAdOx1-S (Oxford/AstraZeneca) |         |               |          |         | 4 months (median 126 days) after 4th dose with ChAdOx1-S (Oxford/AstraZeneca) |         |               |          |         | 3 months (median 91 days) after Comirnaty Bivalent Original/Omicron BA.4/BA.5 (Pfizer-BioNTech) |         |         |               |               |
|--------|-------------------------------|-----------------------------------------------------------------------------|---------|---------------|----------|---------|-------------------------------------------------------------------------------|---------|---------------|----------|---------|-------------------------------------------------------------------------------------------------|---------|---------|---------------|---------------|
|        |                               | D614G                                                                       | BA.4    | XBB.1.5       | XBB.1.16 | EG.5.1  | D614G                                                                         | BA.4    | XBB.1.5       | XBB.1.16 | EG.5.1  | D614G                                                                                           | BA.4    | XBB.1.5 | XBB.1.16      | EG.5.1        |
| 2B-D   | Variants                      | D614G                                                                       | BA.4    | XBB.1.5       | XBB.1.16 | EG.5.1  | D614G                                                                         | BA.4    | XBB.1.5       | XBB.1.16 | EG.5.1  | D614G                                                                                           | BA.4    | XBB.1.5 | XBB.1.16      | EG.5.1        |
|        | D614G                         | -                                                                           | <0.0001 | <0.0001       | <0.0001  | <0.0001 | -                                                                             | <0.0001 | <0.0001       | <0.0001  | <0.0001 | -                                                                                               | 0.0209  | <0.0001 | <0.0001       | <0.0001       |
|        | BA.4                          | <0.0001                                                                     | -       | <0.0001       | <0.0001  | <0.0001 | <0.0001                                                                       | -       | <0.0001       | <0.0001  | <0.0001 | 0.0209                                                                                          | -       | <0.0001 | <0.0001       | <0.0001       |
|        | XBB.1.5                       | <0.0001                                                                     | <0.0001 | -             | <0.0001  | <0.0001 | <0.0001                                                                       | <0.0001 | -             | <0.0001  | <0.0001 | <0.0001                                                                                         | <0.0001 | -       | <0.0001       | <0.0001       |
|        | XBB.1.16                      | <0.0001                                                                     | <0.0001 | <0.0001       | -        | 0.0017  | <0.0001                                                                       | <0.0001 | <0.0001       | -        | 0.0011  | <0.0001                                                                                         | <0.0001 | <0.0001 | -             | <b>0.7282</b> |
| 2E     | EG.5.1                        | <0.0001                                                                     | <0.0001 | <0.0001       | 0.0017   | -       | <0.0001                                                                       | <0.0001 | <0.0001       | 0.0011   | -       | <0.0001                                                                                         | <0.0001 | <0.0001 | <b>0.7282</b> | -             |
|        | 1mo post-4 <sup>th</sup> dose | -                                                                           | -       | -             | -        | -       | <b>0.0967</b>                                                                 | 0.0064  | <b>0.0555</b> | 0.0075   | 0.0006  | <b>0.3126</b>                                                                                   | 0.0029  | 0.0001  | <0.0001       | <0.0001       |
|        | 4mo post-4 <sup>th</sup> dose | <b>0.0967</b>                                                               | 0.0064  | <b>0.0555</b> | 0.0075   | 0.0006  | -                                                                             | -       | -             | -        | -       | 0.0005                                                                                          | <0.0001 | <0.0001 | <0.0001       | <0.0001       |
|        | 3mo post-5 <sup>th</sup> dose | <b>0.3126</b>                                                               | 0.0029  | 0.0001        | <0.0001  | <0.0001 | 0.0005                                                                        | <0.0001 | <0.0001       | <0.0001  | <0.0001 | -                                                                                               | -       | -       | -             | -             |

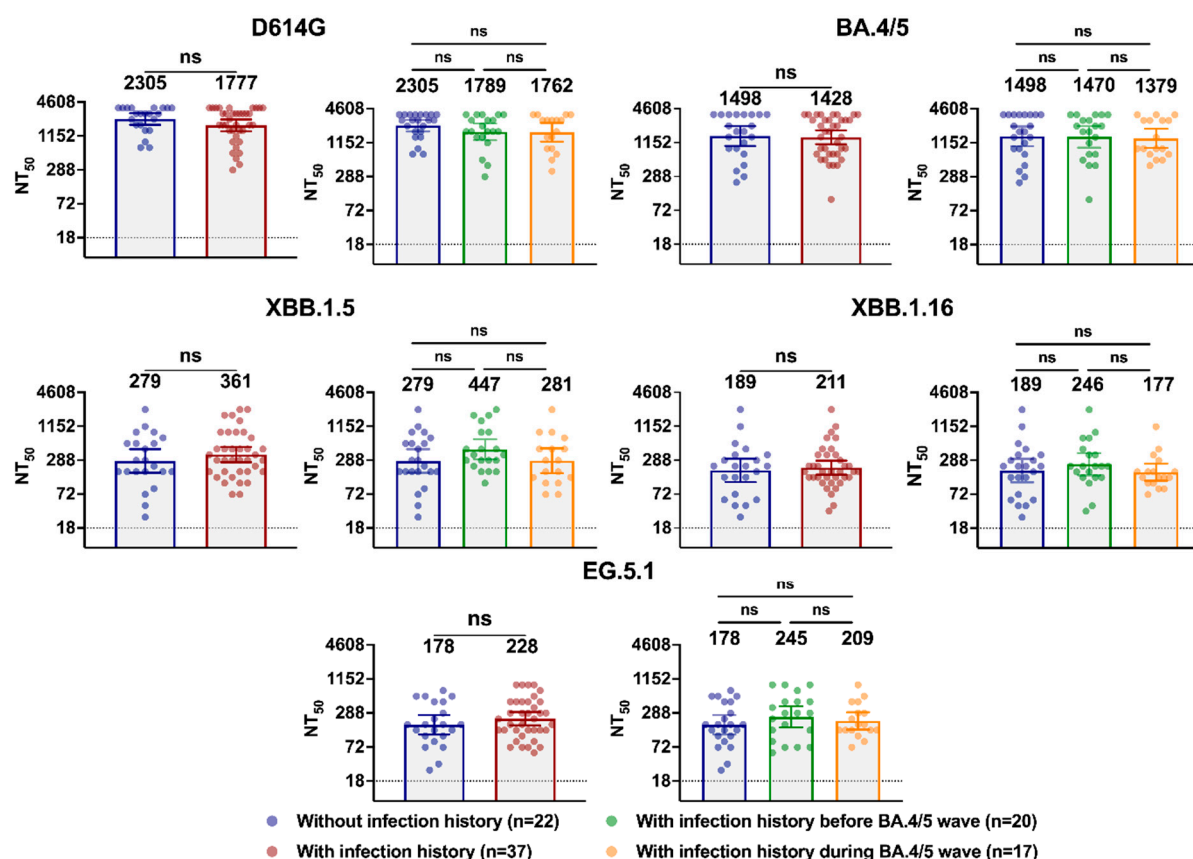

**Supplemental Figure S1. Neutralization against Omicron sublineages BA.4/5, XBB.1.5, XBB.1.16 and EG.5.1 in individuals with or without history of infection by SARS-CoV-2. (A-B)** NT<sub>50</sub> values of 22 and 37 human sera without and with infection history, respectively, against Omicron BA.4/5, XBB.1.5, XBB.1.16 and EG.5.1, collected after **(A)** 1 month (median 36 days) post 4<sup>th</sup> dose with parental ChAdOx1-S vaccine, and **(B)** 3 months (median 92 days) post 5<sup>th</sup> dose with bivalent mRNA vaccine. Geometric mean titers (GMTs) are noted above the respective groups. Colors designate infection history, data points represent individual subjects, bars represents GMT with 95% confidence intervals (CI) and dotted lines represent the lower limit of detection of NT<sub>50</sub> (LOD=18). Groups were compared by non-parametric Mann-Whitney test (ns = not significant, \* = p<0.05). Panels (A-B) were generated using GraphPad Prism v10.0 software.

**Supplemental Table S5. Geometric mean titers (GMTs) with 95% CI of neutralizing titers against SARS-CoV-2 ancestral strain (D614G) and Omicron sublineages BA.4/5, XBB.1.5, XBB.1.16 and EG.5.1 at 1 and 4 months post 4<sup>th</sup> dose with ChAdOx1-S (Oxford/AstraZeneca) and 3 months post 5<sup>th</sup> dose with Comirnaty Bivalent Original/Omicron BA.4/BA.5 (Pfizer-BioNTech).** Individual NT<sub>50</sub> values is the geometric mean (GMT) of triplicate CPE-VNT results (one independent experiment). Titers below the LOD (<20) were represented by half the LOD, 10 for plot purpose and statistical analysis. NT<sub>50</sub>, 50% neutralization antibody titer; 95% CI, 95% confidence interval. p values calculated from nonparametric Mann-Whitney test (unpaired) for group comparison of individuals without and with infection history by SARS-CoV-2 of NT<sub>50</sub> geometric mean titers (GMTs) at each time-point from Figure 3 and Supplemental Figure 1. p values <0.05 (statistically significant) are highlighted in red.

| Time-point                                                                                      | Neutralizing antibodies titer (NT50) - GMT and 95% CI |      |         |          |        |       |      |         |             |        |       |      |         |          |        |       | p values                      |         |          |        | p values                                         |               |         |          | p values                                                      |        |        |         | p values                                                                      |        |        |               |         |          |               |        |        |        |        |        |
|-------------------------------------------------------------------------------------------------|-------------------------------------------------------|------|---------|----------|--------|-------|------|---------|-------------|--------|-------|------|---------|----------|--------|-------|-------------------------------|---------|----------|--------|--------------------------------------------------|---------------|---------|----------|---------------------------------------------------------------|--------|--------|---------|-------------------------------------------------------------------------------|--------|--------|---------------|---------|----------|---------------|--------|--------|--------|--------|--------|
|                                                                                                 | Without (n=22)                                        |      |         |          |        |       |      |         | With (n=37) |        |       |      |         |          |        |       | Without (n=22) vs With (n=37) |         |          |        | Without (n=22) vs With before BA.4/5 wave (n=20) |               |         |          | Without (n=22) vs With during and/or after BA.4/5 wave (n=17) |        |        |         | With before BA.4/5 wave (n=20) vs With during and/or after BA.4/5 wave (n=17) |        |        |               |         |          |               |        |        |        |        |        |
|                                                                                                 | D614G                                                 | BA.4 | XBB 1.5 | XBB 1.16 | EG.5.1 | D614G | BA.4 | XBB 1.5 | XBB 1.16    | EG.5.1 | D614G | BA.4 | XBB 1.5 | XBB 1.16 | EG.5.1 | D614G | BA.4                          | XBB 1.5 | XBB 1.16 | EG.5.1 | D614G                                            | BA.4          | XBB 1.5 | XBB 1.16 | EG.5.1                                                        | D614G  | BA.4   | XBB 1.5 | XBB 1.16                                                                      | EG.5.1 | D614G  | BA.4          | XBB 1.5 | XBB 1.16 | EG.5.1        |        |        |        |        |        |
| 1 month (median 36 days) after 4th dose with ChAdOx1-S (Oxford/AstraZeneca)                     | 1452                                                  | 573  | 100     | 46       | 61     | 1510  | 982  | 138     | 63          | 96     | 1558  | 937  | 184     | 81       | 116    | 1456  | 1037                          | 98      | 47       | 77     | 0.9717                                           | 0.2418        | 0.4104  | 0.3457   | 0.1783                                                        | 0.9347 | 0.3499 | 0.1571  | 0.1133                                                                        | 0.0813 | 0.8705 | 0.2932        | 0.9274  | 0.9493   | 0.6372        | 0.8364 | 0.9819 | 0.1296 | 0.1293 | 0.2632 |
| 4 months (median 126 days) after 4th dose with ChAdOx1-S (Oxford/AstraZeneca)                   | 924                                                   | 279  | 53      | 27       | 31     | 1384  | 556  | 87      | 35          | 49     | 1388  | 399  | 82      | 36       | 45     | 1379  | 823                           | 93      | 35       | 55     | 0.0573                                           | <b>0.0367</b> | 0.1135  | 0.1485   | <b>0.0346</b>                                                 | 0.0675 | 0.2719 | 0.2605  | 0.17                                                                          | 0.1362 | 0.1711 | <b>0.0109</b> | 0.1137  | 0.2901   | <b>0.0328</b> | 0.9576 | 0.1135 | 0.9577 | 0.8244 | 0.4523 |
| 3 months (median 91 days) after Comirnaty Bivalent Original/Omicron BA.4/BA.5 (Pfizer-BioNTech) | 2305                                                  | 1498 | 279     | 189      | 178    | 1777  | 1428 | 361     | 211         | 228    | 1789  | 1470 | 447     | 246      | 245    | 1762  | 1379                          | 281     | 177      | 209    | 0.1821                                           | 0.6621        | 0.5133  | 0.9284   | 0.3999                                                        | 0.2374 | 0.9142 | 0.1869  | 0.5424                                                                        | 0.3183 | 0.283  | 0.5086        | 0.7728  | 0.6074   | 0.698         | 0.9697 | 0.7437 | 0.1532 | 0.1165 | 0.5487 |
